# Supplementary material
Source: publisher figshare collection journal article supplement (https://springernature.figshare.com/ndownloader/files/14145770)
Supplement: Supplementary file [file 14145770]

INSPECTION REPORT FOR PHARMACY/DRUG OUTLETS IN PUBLIC AND PNFP HEALTH FACILITIES  
MAY 2013 VERSION

**National Drug Authority**

P.O BOX 23096 KAMPALA

PLOT 46-48 LUMUMBA AVENUE

Tel. 0414 255665/347391/347392

Fax: 0414 255758

E-mail: ndaug@nda.or.ug; inspectorate@nda.or.ug

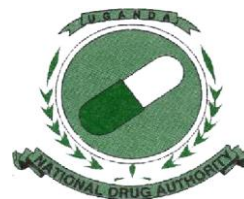

**INSPECTION REPORT FOR PHARMACY/DRUG OUTLETS IN PUBLIC AND  
PRIVATE NOT FOR PROFIT (PNFP) HEALTH FACILITIES**

Indicator Key:

|            |                    |
|------------|--------------------|
| **         | CRITICAL Indicator |
| *          | MAJOR Indicator    |
| (no stars) | MINOR Indicator    |

**PART A: Pharmacy/drug outlet information**

|                                                                                |                                                            |                                |                                                                               |
|--------------------------------------------------------------------------------|------------------------------------------------------------|--------------------------------|-------------------------------------------------------------------------------|
| 1. NDA Region                                                                  |                                                            |                                |                                                                               |
| 2. District                                                                    |                                                            |                                |                                                                               |
| 3. Name of health facility                                                     |                                                            |                                |                                                                               |
| 4. Level and ownership (health facility)                                       | Public <input type="radio"/><br>PNFP <input type="radio"/> | Hospital <input type="radio"/> | HC4 <input type="radio"/> HC3 <input type="radio"/> HC2 <input type="radio"/> |
| a) Physical address of premises                                                |                                                            |                                |                                                                               |
| b) GIS coordinates                                                             |                                                            |                                |                                                                               |
| c) Name of in-charge of the facility                                           |                                                            |                                |                                                                               |
| d) Telephone number (for In-Charge)                                            |                                                            |                                |                                                                               |
| e) Email address (for In-Charge)                                               |                                                            |                                |                                                                               |
| 5. Is the license application new or renewal (tick)?                           | Renewal <input type="radio"/> New <input type="radio"/>    |                                |                                                                               |
| a) Write previous license number, if renewal (Indicate N/A for new inspection) |                                                            |                                |                                                                               |
| 6. Date of inspection                                                          |                                                            |                                |                                                                               |
| 7. Name and address of nearest retail pharmacy to premises                     |                                                            |                                |                                                                               |
| 8. Approximate distance to nearest pharmacy (km)                               |                                                            |                                |                                                                               |
| 9. Inspector (name and phone number)                                           |                                                            |                                |                                                                               |

## PART B: Ownership and staffing

| 10. Name of owner                                                                                      |               |                                                           |                |
|--------------------------------------------------------------------------------------------------------|---------------|-----------------------------------------------------------|----------------|
| 11. Number and qualification of staff working in store, pharmacy or dispensary (fill out table below)? |               |                                                           |                |
| Number of staff                                                                                        | Qualification | Role (include all roles of staff with this qualification) |                |
|                                                                                                        |               |                                                           |                |
|                                                                                                        |               |                                                           |                |
|                                                                                                        |               |                                                           |                |
|                                                                                                        |               |                                                           |                |
|                                                                                                        |               | Name                                                      | Qualifications |
| 12. Name and qualifications of person dispensing today                                                 |               |                                                           |                |
| 13. Is the person dispensing today qualified to dispense?                                              |               | <b>Yes</b>                                                |                |
|                                                                                                        |               | <b>No</b>                                                 |                |

## PART C: Premises

| Indicator                                                                                                                                                                          | Location   | Acceptable | Needs Improvement | Unacceptable |
|------------------------------------------------------------------------------------------------------------------------------------------------------------------------------------|------------|------------|-------------------|--------------|
| 14. ** Walls are clean without holes and signs of humidity and degradation, and made of a material that allows for easy cleaning (tiles or oil paint).                             | Dispensary |            |                   |              |
|                                                                                                                                                                                    | Store      |            |                   |              |
| <b>Comments</b>                                                                                                                                                                    |            |            |                   |              |
| 15. ** Roof is in good condition to avoid water penetration. It is without holes or signs that water is running through. There is a ceiling made of cardboards, papyrus or cement. | Dispensary |            |                   |              |
|                                                                                                                                                                                    | Store      |            |                   |              |
| <b>Comments</b>                                                                                                                                                                    |            |            |                   |              |
| 16. * Floors are made of a material that is easy to clean, free of holes and big cracks and the floor appears clean and newly swept and washed also in the corners.                | Dispensary |            |                   |              |
|                                                                                                                                                                                    | Store      |            |                   |              |
| <b>Comments</b>                                                                                                                                                                    |            |            |                   |              |
| 17. ** The medicines are protected from direct sunlight (painted glass, curtains, blinds or no windows).                                                                           | Dispensary |            |                   |              |
|                                                                                                                                                                                    | Store      |            |                   |              |
| <b>Comments</b>                                                                                                                                                                    |            |            |                   |              |

INSPECTION REPORT FOR PHARMACY/DRUG OUTLETS IN PUBLIC AND PNFP HEALTH FACILITIES  
MAY 2013 VERSION

| Indicator                                                                                                                                                                                                                                                                            | Location   | Acceptable             | Needs Improvement | Unacceptable |
|--------------------------------------------------------------------------------------------------------------------------------------------------------------------------------------------------------------------------------------------------------------------------------------|------------|------------------------|-------------------|--------------|
| 18. * There are no signs of pests, harmful insects or rodents seen.                                                                                                                                                                                                                  | Dispensary |                        |                   |              |
|                                                                                                                                                                                                                                                                                      | Store      |                        |                   |              |
| <b>Comments</b>                                                                                                                                                                                                                                                                      |            |                        |                   |              |
| 19. The temperature is monitored daily and the temperature is recorded.                                                                                                                                                                                                              | Dispensary |                        |                   |              |
|                                                                                                                                                                                                                                                                                      | Store      |                        |                   |              |
| <b>Comments</b>                                                                                                                                                                                                                                                                      |            |                        |                   |              |
| 20. The temperature can be regulated with ventilation, air-condition or by opening windows.                                                                                                                                                                                          | Dispensary |                        |                   |              |
|                                                                                                                                                                                                                                                                                      | Store      |                        |                   |              |
| <b>Comments</b>                                                                                                                                                                                                                                                                      |            |                        |                   |              |
| Indicator                                                                                                                                                                                                                                                                            | Location   | Size (m <sup>2</sup> ) | Yes               | No           |
| 21. Write size (m <sup>2</sup> ) and score. Space requirements: <ul style="list-style-type: none"> <li>• dispensary/pharmacy ≥ 4m<sup>2</sup>,</li> <li>• store (drug outlets in HC2/HC3) ≥ 6m<sup>2</sup> and</li> <li>• store(pharmacies in HC4/hosp) ≥ 20m<sup>2</sup></li> </ul> | Dispensary |                        |                   |              |
|                                                                                                                                                                                                                                                                                      | Store      |                        |                   |              |
| <b>Comments</b>                                                                                                                                                                                                                                                                      |            |                        |                   |              |
| Indicator                                                                                                                                                                                                                                                                            | Location   | Acceptable             | Needs Improvement | Unacceptable |
| 22. * The size of the store is adequate having enough shelves and layout so medicines can be organized systematically.                                                                                                                                                               | Dispensary |                        |                   |              |
|                                                                                                                                                                                                                                                                                      | Store      |                        |                   |              |
| <b>Comments</b>                                                                                                                                                                                                                                                                      |            |                        |                   |              |
| 23. * The pharmacy/store is lockable and access limited to authorized personnel.                                                                                                                                                                                                     | Dispensary |                        |                   |              |
|                                                                                                                                                                                                                                                                                      | Store      |                        |                   |              |
| <b>Comments</b>                                                                                                                                                                                                                                                                      |            |                        |                   |              |
| Indicator                                                                                                                                                                                                                                                                            | Location   | Yes                    | No                |              |
| 24. There are procedures for access when store in-charge is not there?                                                                                                                                                                                                               | Dispensary |                        |                   |              |
|                                                                                                                                                                                                                                                                                      | Store      |                        |                   |              |
| <b>Comments</b>                                                                                                                                                                                                                                                                      |            |                        |                   |              |

INSPECTION REPORT FOR PHARMACY/DRUG OUTLETS IN PUBLIC AND PNFP HEALTH FACILITIES  
MAY 2013 VERSION

| Indicator                                                                                                                                                                                                                                      | Location                          | Acceptable | Needs Improvement | Unacceptable |     |
|------------------------------------------------------------------------------------------------------------------------------------------------------------------------------------------------------------------------------------------------|-----------------------------------|------------|-------------------|--------------|-----|
| 25. The premises appear clean <u>and</u> tidy. Cleaning of floors is done daily and shelves are dusted weekly. The practices are documented.                                                                                                   | Dispensary                        |            |                   |              |     |
|                                                                                                                                                                                                                                                | Store                             |            |                   |              |     |
| <b>Comments</b>                                                                                                                                                                                                                                |                                   |            |                   |              |     |
| 26. Fire safety equipment (fire extinguisher or bucket with sand or water, or big blanket) is available and accessible.                                                                                                                        | Health facility                   |            |                   |              |     |
| <b>Comments</b>                                                                                                                                                                                                                                |                                   |            |                   |              |     |
| Indicator                                                                                                                                                                                                                                      | Location                          | Acceptable | Needs Improvement | Unacceptable | N/A |
| 27. ** There is a functioning system for cold storage/refrigerator. (Check "N/A" if it is a HC2 with no need for cold system)                                                                                                                  | Health facility                   |            |                   |              |     |
| <b>Comments</b>                                                                                                                                                                                                                                |                                   |            |                   |              |     |
| 28. The temperature of the refrigerator is monitored and recorded on a daily basis. (Check "N/A" if there is no fridge)                                                                                                                        | Health facility                   |            |                   |              |     |
| <b>Comments</b>                                                                                                                                                                                                                                |                                   |            |                   |              |     |
| Indicator                                                                                                                                                                                                                                      | Location                          | Acceptable | Needs Improvement | Unacceptable |     |
| 29. **Toilet facilities for staff are acceptable (pit latrine, flush toilet); <ul style="list-style-type: none"> <li>hygienic (clean),</li> <li>functioning (in working condition) and</li> <li>toilet paper is available to staff.</li> </ul> | Health facility or Staff Quarters |            |                   |              |     |
| <b>Comments</b>                                                                                                                                                                                                                                |                                   |            |                   |              |     |
| 30. **Hand washing facilities for staff are acceptable; <ul style="list-style-type: none"> <li>hygienic,</li> <li>functioning, and</li> <li>soap is available</li> </ul>                                                                       | Health facility                   |            |                   |              |     |
| <b>Comments</b>                                                                                                                                                                                                                                |                                   |            |                   |              |     |

## PART D: Dispensing

| Indicator                                                                                                                                                                       | Location        | Acceptable | Needs Improvement | Unacceptable |
|---------------------------------------------------------------------------------------------------------------------------------------------------------------------------------|-----------------|------------|-------------------|--------------|
| 31. *Appropriate packaging material for tablets and capsules available.                                                                                                         | Dispensary      |            |                   |              |
| <b>Comments</b>                                                                                                                                                                 |                 |            |                   |              |
| 32. *Tablet counting tray and spatula/spoon are available. Comment if creative trays are used.                                                                                  | Dispensary      |            |                   |              |
| <b>Comments</b>                                                                                                                                                                 |                 |            |                   |              |
| Indicator                                                                                                                                                                       | Location        | Yes        | No                |              |
| 33. Tablets are not counted with bare hands but using a counting tray, spatula or gloved hands.                                                                                 | Dispensary      |            |                   |              |
| <b>Comments</b>                                                                                                                                                                 |                 |            |                   |              |
| Indicator                                                                                                                                                                       | Location        | Acceptable | Needs Improvement | Unacceptable |
| 34. Check if tablet counting tray and spatula and/or gloves are clean.                                                                                                          | Dispensary      |            |                   |              |
| <b>Comments</b>                                                                                                                                                                 |                 |            |                   |              |
| 35. There is provision for cleaning utensils with clean water.                                                                                                                  | Health facility |            |                   |              |
| <b>Comments</b>                                                                                                                                                                 |                 |            |                   |              |
| 36. All tins/bottles that have been opened but are not in use (no current dispensing from it) are covered with a lid.                                                           | Dispensary      |            |                   |              |
| <b>Comments</b>                                                                                                                                                                 |                 |            |                   |              |
| 37. There is a control of the prescription carried out before dispensing (right medicine, strength and dose appropriate for indication and patient age) (prescription control). | Dispensary      |            |                   |              |
| <b>Comments</b>                                                                                                                                                                 |                 |            |                   |              |

INSPECTION REPORT FOR PHARMACY/DRUG OUTLETS IN PUBLIC AND PNFP HEALTH FACILITIES  
MAY 2013 VERSION

| Indicator                                                                                                                                                     | Location        | Acceptable | Needs Improvement | Unacceptable |
|---------------------------------------------------------------------------------------------------------------------------------------------------------------|-----------------|------------|-------------------|--------------|
| 38. There is a control to countercheck the medicine to be dispensed (medicine, strength and quantity correct according to prescription) (dispensing control)? | Dispensary      |            |                   |              |
| <b>Comments</b>                                                                                                                                               |                 |            |                   |              |
| 39. Privacy is achieved during dispensing (other waiting patients should be at least 2 meters away from dispensing window).                                   | Dispensary      |            |                   |              |
| <b>Comments</b>                                                                                                                                               |                 |            |                   |              |
| 40. Chairs/benches available for customers/patients so they can sit while waiting for their medicines?                                                        | Dispensary      |            |                   |              |
| <b>Comments</b>                                                                                                                                               |                 |            |                   |              |
| 41. Hand washing facilities and soap available to customer/patient.                                                                                           | Dispensary      |            |                   |              |
| <b>Comments</b>                                                                                                                                               |                 |            |                   |              |
| 42. Drinking water (to take tablets) is available to customer/patient (the water should be bottled, purified or boiled).                                      | Dispensary      |            |                   |              |
| <b>Comments</b>                                                                                                                                               |                 |            |                   |              |
| Indicator                                                                                                                                                     | Location        | Yes        | No                |              |
| 43. *A prescription recording system is available.                                                                                                            | Health facility |            |                   |              |
| <b>Comments</b>                                                                                                                                               |                 |            |                   |              |
| Indicator                                                                                                                                                     | Location        | Acceptable | Needs Improvement | Unacceptable |
| 44. *Prescription recording system includes date, patient number or name, diagnosis, medicine name, prescriber name, amount prescribed and dispensed.         | Health facility |            |                   |              |
| <b>Comments</b>                                                                                                                                               |                 |            |                   |              |

INSPECTION REPORT FOR PHARMACY/DRUG OUTLETS IN PUBLIC AND PNFP HEALTH FACILITIES  
MAY 2013 VERSION

| Indicator                                                                                                                                                                                                                                                                                                                                                                                                                                                                                               | Location        | Acceptable  | Needs Improvement | Unacceptable    | N/A              |
|---------------------------------------------------------------------------------------------------------------------------------------------------------------------------------------------------------------------------------------------------------------------------------------------------------------------------------------------------------------------------------------------------------------------------------------------------------------------------------------------------------|-----------------|-------------|-------------------|-----------------|------------------|
| 45. A book for prescription for class A drugs (narcotics) are available in HC IV and hospitals. (Select N/A for HC III and HC II.)                                                                                                                                                                                                                                                                                                                                                                      | Health facility |             |                   |                 |                  |
| <b>Comments</b>                                                                                                                                                                                                                                                                                                                                                                                                                                                                                         |                 |             |                   |                 |                  |
|                                                                                                                                                                                                                                                                                                                                                                                                                                                                                                         |                 |             |                   |                 |                  |
| Indicator                                                                                                                                                                                                                                                                                                                                                                                                                                                                                               | Location        | Yes         | No                |                 |                  |
| 46. Checks that prescriptions/prescription books (can be the OPD book) are kept for a minimum of 5 years?                                                                                                                                                                                                                                                                                                                                                                                               | Health facility |             |                   |                 |                  |
| <b>Comments</b>                                                                                                                                                                                                                                                                                                                                                                                                                                                                                         |                 |             |                   |                 |                  |
|                                                                                                                                                                                                                                                                                                                                                                                                                                                                                                         |                 |             |                   |                 |                  |
| 47. Observe that ALL patients receiving dispensed prescription medicines are recorded                                                                                                                                                                                                                                                                                                                                                                                                                   | Health facility |             |                   |                 |                  |
| <b>Comments</b>                                                                                                                                                                                                                                                                                                                                                                                                                                                                                         |                 |             |                   |                 |                  |
|                                                                                                                                                                                                                                                                                                                                                                                                                                                                                                         |                 |             |                   |                 |                  |
| 48. **Medicines are labeled correctly. Check if the labeling on the dispensing envelope is proper for 3 patients coming from pharmacy. Fill in the table below with Yes or No.<br><ul style="list-style-type: none"> <li>Select "Acceptable" if all areas in columns 1)-6) are scored yes.</li> <li>Select "Needs Improvement" if at least all areas in columns 1) and 4) are scored yes.</li> <li>Select "Unacceptable" if there is a single "No" score in any area under columns 1) and 4)</li> </ul> | Health facility |             |                   |                 |                  |
|                                                                                                                                                                                                                                                                                                                                                                                                                                                                                                         |                 | Acceptable  | Needs Improvement | Unacceptable    |                  |
| 1) Medicine name                                                                                                                                                                                                                                                                                                                                                                                                                                                                                        | 2) Strength     | 3) Quantity | 4) Dosage (dose)  | 5) Patient name | 6) Facility name |
|                                                                                                                                                                                                                                                                                                                                                                                                                                                                                                         |                 |             |                   |                 |                  |
|                                                                                                                                                                                                                                                                                                                                                                                                                                                                                                         |                 |             |                   |                 |                  |
|                                                                                                                                                                                                                                                                                                                                                                                                                                                                                                         |                 |             |                   |                 |                  |
| <b>Comments</b>                                                                                                                                                                                                                                                                                                                                                                                                                                                                                         |                 |             |                   |                 |                  |
|                                                                                                                                                                                                                                                                                                                                                                                                                                                                                                         |                 |             |                   |                 |                  |

INSPECTION REPORT FOR PHARMACY/DRUG OUTLETS IN PUBLIC AND PNFP HEALTH FACILITIES  
MAY 2013 VERSION

|                                                                                                                                                                                                                                                                                                                                                                                                              |  |  |                 |     |    |
|--------------------------------------------------------------------------------------------------------------------------------------------------------------------------------------------------------------------------------------------------------------------------------------------------------------------------------------------------------------------------------------------------------------|--|--|-----------------|-----|----|
| 49. Customer/patient knows how to take medicine. Check by asking 3 patients (the same as labeling is checked for) coming from pharmacy and fill the table below indicating if patient knows 'Yes' or does not know 'No'. <ul style="list-style-type: none"> <li>Select "Yes" if at least all areas in columns 1) 2) 5) scored yes.</li> <li>Select "No" if any areas in Columns 1) 2) 5) has a no</li> </ul> |  |  | Health facility | Yes | No |
|                                                                                                                                                                                                                                                                                                                                                                                                              |  |  |                 |     |    |

| 1) Dose (how much to take) | 2) Frequency (how often to take) | 3) Duration (how long to take) | 4) Indication (why to take) | 5) Instructions on how to take medicine (with food etc) |
|----------------------------|----------------------------------|--------------------------------|-----------------------------|---------------------------------------------------------|
|                            |                                  |                                |                             |                                                         |
|                            |                                  |                                |                             |                                                         |
|                            |                                  |                                |                             |                                                         |

**Comments**

### PART E: Store management

| Indicator                                                                                                                                         | Location   | Acceptable | Needs Improvement | Unacceptable |
|---------------------------------------------------------------------------------------------------------------------------------------------------|------------|------------|-------------------|--------------|
| 50. * Medicine packs are stored only on shelves and/or in cupboards and they are not stored in disorganized stacks or boxes directly on the floor | Dispensary |            |                   |              |
|                                                                                                                                                   | Store      |            |                   |              |
| <b>Comments</b>                                                                                                                                   |            |            |                   |              |
| 51. * Stock cards are available (check for 10 items).                                                                                             | Store      |            |                   |              |
| <b>Comments</b>                                                                                                                                   |            |            |                   |              |

| Indicator                                                                                                          | Location | Acceptable | Needs Improvement | Unacceptable | N/A |
|--------------------------------------------------------------------------------------------------------------------|----------|------------|-------------------|--------------|-----|
| 52. * Stock cards are kept next to the medicines on shelves (or organized in a folder in the store). Check to see. | Store    |            |                   |              |     |
| <b>Comments</b>                                                                                                    |          |            |                   |              |     |



INSPECTION REPORT FOR PHARMACY/DRUG OUTLETS IN PUBLIC AND PNFP HEALTH FACILITIES  
MAY 2013 VERSION

| Indicator                                                                                                                                                                    | Location        | Acceptable | Needs Improvement | Unacceptable | N/A |
|------------------------------------------------------------------------------------------------------------------------------------------------------------------------------|-----------------|------------|-------------------|--------------|-----|
| 53. Stock card headers are filled correct with medicine name, strength, dosage form, special storage (check 10 items)? Score 'Acceptable' if all 10 stock cards are correct. | Store           |            |                   |              |     |
| <b>Comments</b>                                                                                                                                                              |                 |            |                   |              |     |
| 54. Physical count is done monthly and clearly indicated in stock cards. Check for 5 items.                                                                                  | Store           |            |                   |              |     |
| <b>Comments</b>                                                                                                                                                              |                 |            |                   |              |     |
| 55. Stock cards correctly updated so physical count and stock card balance is the same (check for 5 items).                                                                  | Store           |            |                   |              |     |
| <b>Comments</b>                                                                                                                                                              |                 |            |                   |              |     |
| Indicator                                                                                                                                                                    | Location        | Acceptable | Needs Improvement | Unacceptable |     |
| 56. Medicine is stored in a systematic manner (alphabetic or therapeutic)?                                                                                                   | Dispensary      |            |                   |              |     |
|                                                                                                                                                                              | Store           |            |                   |              |     |
| <b>Comments</b>                                                                                                                                                              |                 |            |                   |              |     |
| Indicator                                                                                                                                                                    | Location        | Acceptable | Needs Improvement | Unacceptable |     |
| 57. Shelves are labeled with medicine name or class?                                                                                                                         | Dispensary      |            |                   |              |     |
|                                                                                                                                                                              | Store           |            |                   |              |     |
| <b>Comments</b>                                                                                                                                                              |                 |            |                   |              |     |
| 58. Is pharmacy/drug outlet computerized?                                                                                                                                    | Health facility | Yes        |                   |              |     |
|                                                                                                                                                                              |                 | No         |                   |              |     |
| <b>Comments</b>                                                                                                                                                              |                 |            |                   |              |     |
| Indicator                                                                                                                                                                    | Location        | Acceptable | Needs Improvement | Unacceptable |     |
| 59. *There is a record for expired/damaged medicines and health supplies including name, strength, formulation, batch number, expiry date and quantity (check).              | Store           |            |                   |              |     |
| <b>Comments</b>                                                                                                                                                              |                 |            |                   |              |     |

INSPECTION REPORT FOR PHARMACY/DRUG OUTLETS IN PUBLIC AND PNFP HEALTH FACILITIES  
MAY 2013 VERSION

| Indicator                                                                                                                                                   | Location | Acceptable | Needs Improvement | Unacceptable |
|-------------------------------------------------------------------------------------------------------------------------------------------------------------|----------|------------|-------------------|--------------|
| 60. * There is a designated area to store expired/damaged medicines and health supplies away from useable medicine, and the area is clearly marked/ signed? | Store    |            |                   |              |
| <b>Comments</b>                                                                                                                                             |          |            |                   |              |
| 61. * First Expiry First Out (FEFO) is adhered to (check 10 randomly selected medicine/health supplies)?                                                    | Store    |            |                   |              |
| <b>Comments</b>                                                                                                                                             |          |            |                   |              |

## PART F: Operating requirements

| Indicator                                                                                                                                                                                                                                                                                                                                              | Location        | Yes        | No                | N/A          |
|--------------------------------------------------------------------------------------------------------------------------------------------------------------------------------------------------------------------------------------------------------------------------------------------------------------------------------------------------------|-----------------|------------|-------------------|--------------|
| 62. Certificate for suitability in Good Pharmacy Practice displayed                                                                                                                                                                                                                                                                                    | Health facility |            |                   |              |
| <b>Comments</b>                                                                                                                                                                                                                                                                                                                                        |                 |            |                   |              |
| 63. The latest version of reference material available <ul style="list-style-type: none"> <li>Essential Medicines and Health Supplies List for Uganda</li> <li>Uganda Clinical Guidelines (current edition)</li> </ul> (If at least one of the materials is available, check Yes)<br>Comment if the materials are not available at pharmacy/dispensary | Health facility |            | Yes<br><br>No     |              |
| <b>Comments</b>                                                                                                                                                                                                                                                                                                                                        |                 |            |                   |              |
| Indicator                                                                                                                                                                                                                                                                                                                                              | Location        | Acceptable | Needs Improvement | Unacceptable |
| 64. Does the drug outlet have written procedures for the following <ul style="list-style-type: none"> <li>Dispensing</li> <li>Receipt of goods</li> <li>Stock management</li> </ul>                                                                                                                                                                    | Health facility |            |                   |              |
| <b>Comments</b>                                                                                                                                                                                                                                                                                                                                        |                 |            |                   |              |
| 65. *Records (includes delivery notes) kept for received items. Check for 10 items.                                                                                                                                                                                                                                                                    | Health facility | Yes<br>No  |                   |              |
| <b>Comments</b>                                                                                                                                                                                                                                                                                                                                        |                 |            |                   |              |

| 66. Do the records include:   | Yes | No |
|-------------------------------|-----|----|
| a) Date of receipt            |     |    |
| b) Invoice number             |     |    |
| c) Origin (producer/supplier) |     |    |
| d) Quantity received          |     |    |
| e) Batch number               |     |    |
| f) Expiry date                |     |    |
| <b>Comments</b>               |     |    |

## PART G: Summary of findings

Count the number of “unacceptable “/”No” scores

|                                                           | Number |
|-----------------------------------------------------------|--------|
| **CRITICAL Indicators with a score of "Unacceptable"/"No" |        |
| *MAJOR Indicators with a score of "Unacceptable"/"No"     |        |
| MINOR Indicators with a score of "Unacceptable"/"No"      |        |

Drug outlet falls into the following category (check **one**) (Adhere to the certification criteria)

|                                           |  |
|-------------------------------------------|--|
| Certification without comments            |  |
| Certification with minor comments         |  |
| Certification with major comments         |  |
| Not certified until improvements are made |  |

GPP certification number/license number (only if GPP certification is given):

Improvement is needed for the following indicators (see table below)

To get GPP certification Yes ☐ No ☐

To keep GPP certification Yes ☐ No ☐

| Indicator Number | Inspector's Observation |
|------------------|-------------------------|
|                  |                         |
|                  |                         |
|                  |                         |

INSPECTION REPORT FOR PHARMACY/DRUG OUTLETS IN PUBLIC AND PNFP HEALTH FACILITIES  
MAY 2013 VERSION

| Indicator Number | Inspector's Observation |
|------------------|-------------------------|
|                  |                         |
|                  |                         |
|                  |                         |
|                  |                         |
|                  |                         |
|                  |                         |
|                  |                         |

### PART H: Signatures

The inspector signing below **declares that all the above corresponds with the actual findings** in the pharmacy on the day of the inspection

\_\_\_\_\_  
Name of Inspector                      Designation                      Signature

This is **confirmed** by the signature of the Head, Drug Inspectorate Services

\_\_\_\_\_  
Name of Head, Drug Inspectorate Services                      Date                      Signature
